# Supplementary material
Source: PubMed Central journal article supplement (PMC7190442)
Supplement: NIHMS1554694-supplement-PLOSS_Unmodified_Gels_ED_Fig4.pdf [file NIHMS1554694-supplement-PLOSS_Unmodified_Gels_ED_Fig4.pdf]

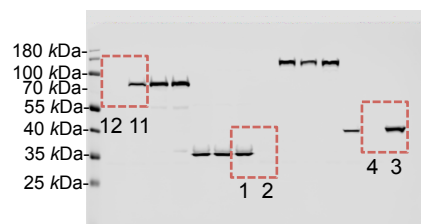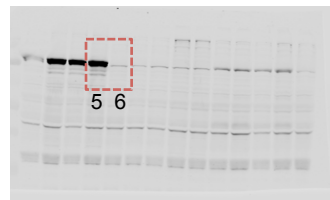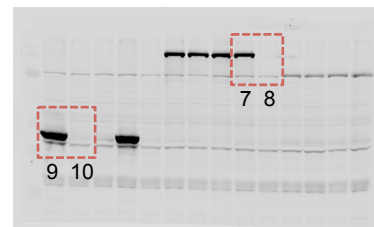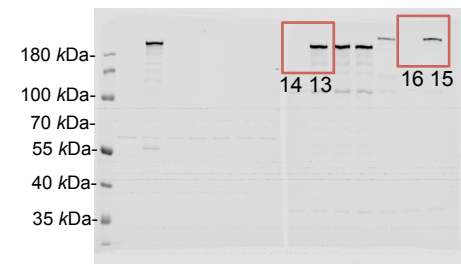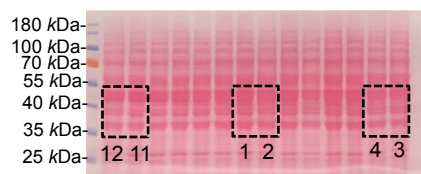

Extended Data Fig. 4a

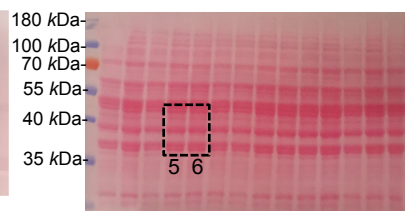

Extended Data Fig. 4a

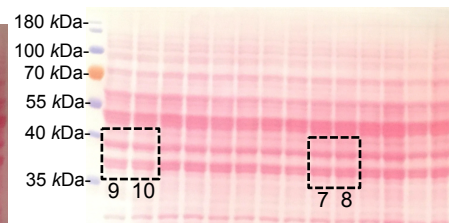

Extended Data Fig. 4a

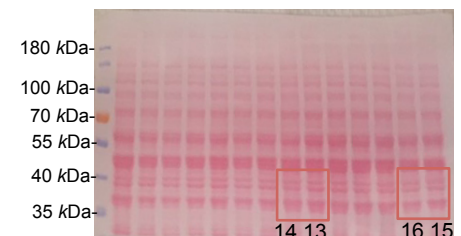

Extended Data Fig. 4a

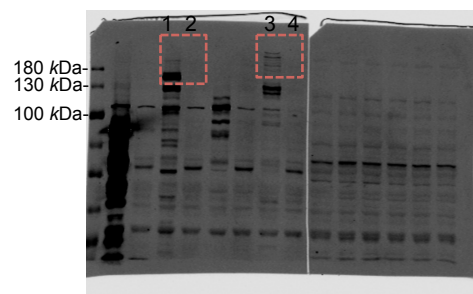

Extended Data Fig. 4b,c

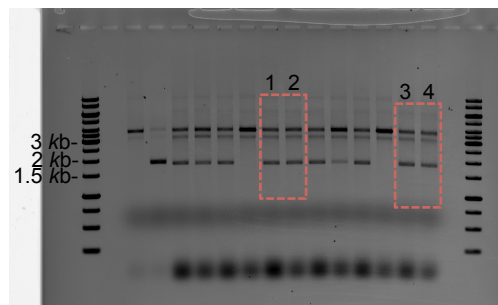

Extended Data Fig. 4b,c
