# Supplementary material
Source: PubMed Central journal article supplement (PMC7190442)
Supplement: NIHMS1554694-supplement-PLOSS_Unmodified_Gels_ED_Fig7.pdf [file NIHMS1554694-supplement-PLOSS_Unmodified_Gels_ED_Fig7.pdf]

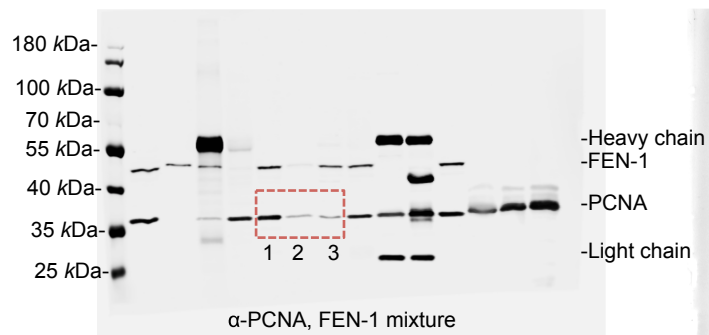

Extended Data Fig. 7a

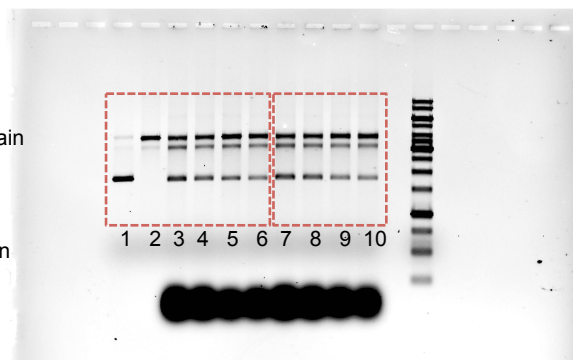

Extended Data Fig. 7a

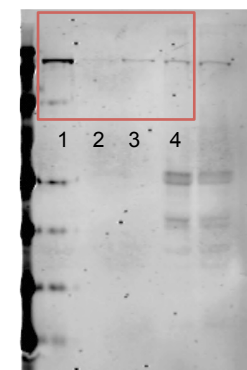

Extended Data Fig. 7b

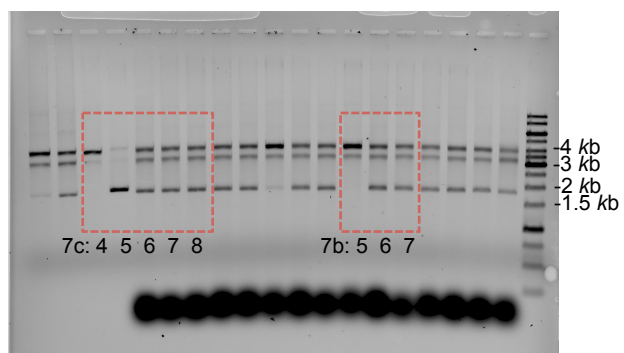

Extended Data Fig. 7b,c

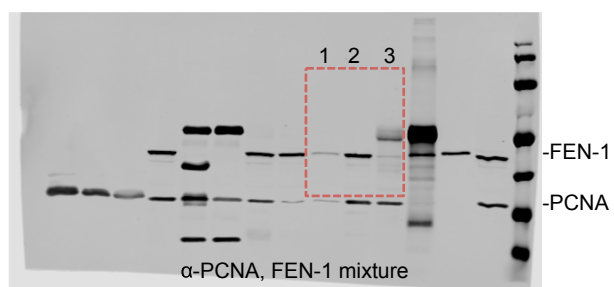

Extended Data Fig. 7c (same blot as Extended Data Fig. 7a, different intensity)

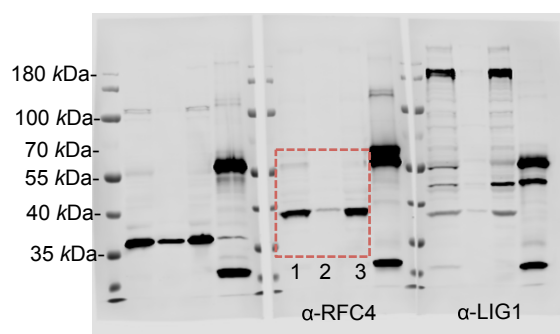

Extended Data Fig. 7d  
(high intensity)

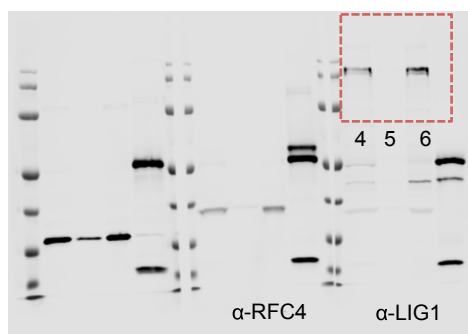

Extended Data Fig. 7d  
(low intensity)
