# Supplementary material
Source: PubMed Central journal article supplement (PMC7190442)

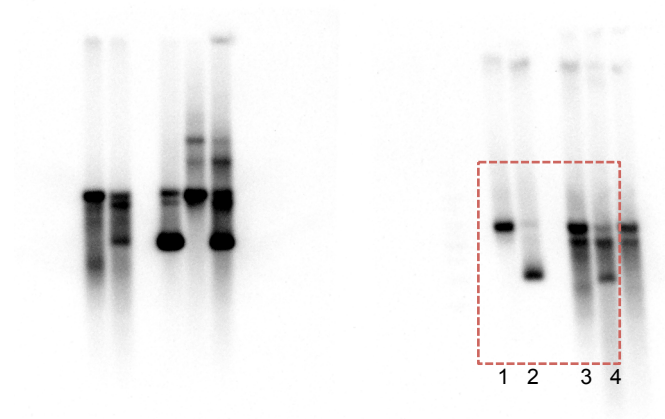

Extended Data Fig. 2a

Supplement: NIHMS1554694-supplement-PLOSS_Unmodified_Gels_ED_Fig2.pdf [file NIHMS1554694-supplement-PLOSS_Unmodified_Gels_ED_Fig2.pdf]

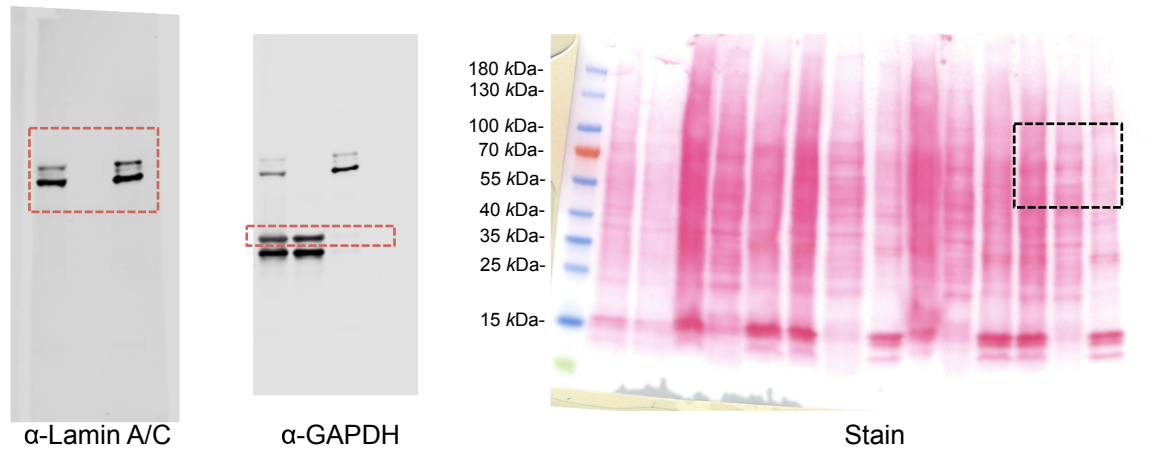

Extended Data Fig. 5a

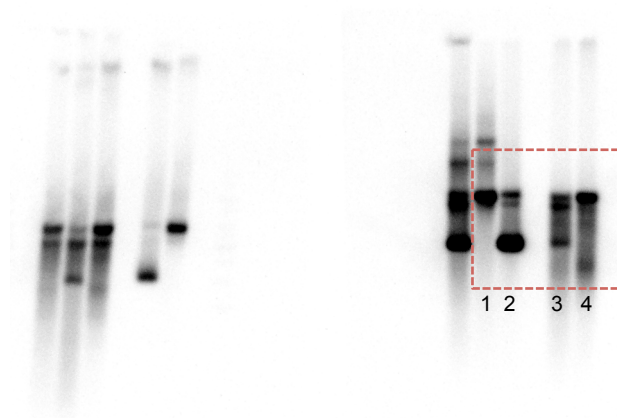

Extended Data Fig. 5b

Supplement: NIHMS1554694-supplement-PLOSS_Unmodified_Gels_ED_Fig5.pdf [file NIHMS1554694-supplement-PLOSS_Unmodified_Gels_ED_Fig5.pdf]

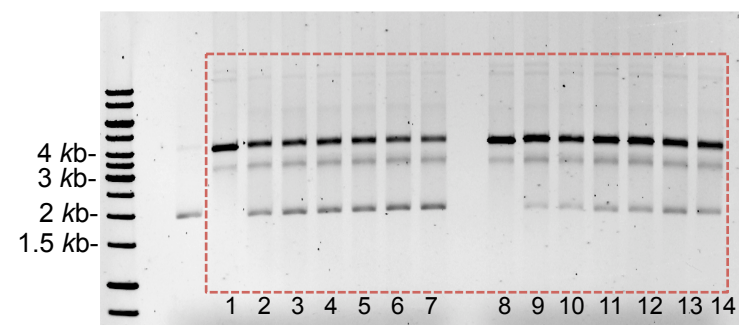

Extended Data Fig. 6b

Supplement: NIHMS1554694-supplement-PLOSS_Unmodified_Gels_ED_Fig6.pdf [file NIHMS1554694-supplement-PLOSS_Unmodified_Gels_ED_Fig6.pdf]

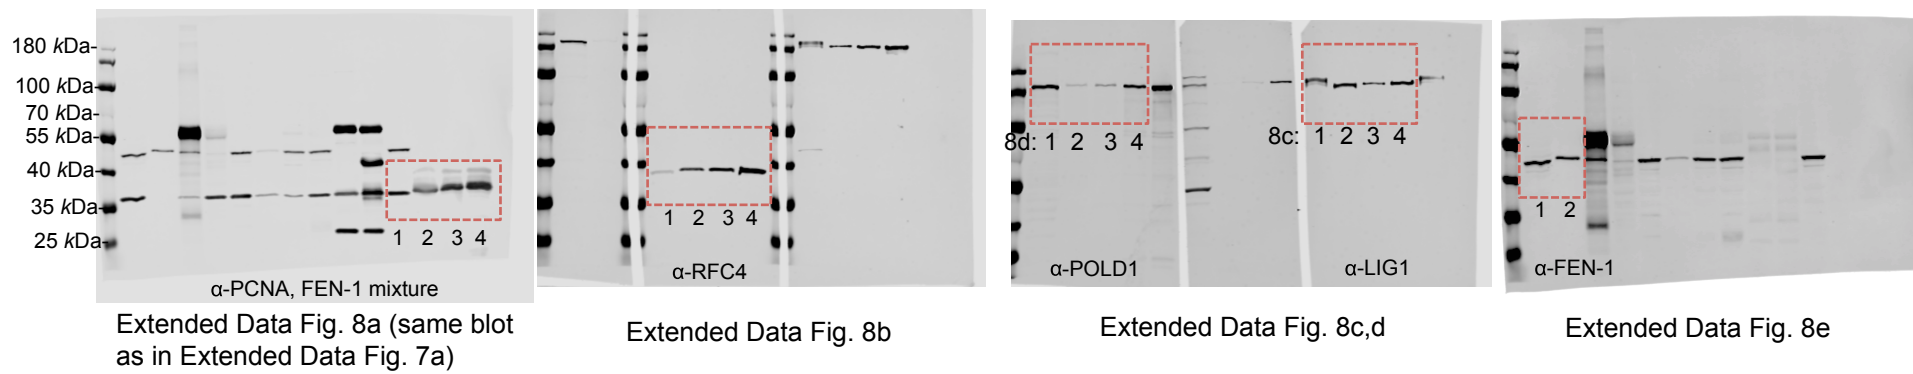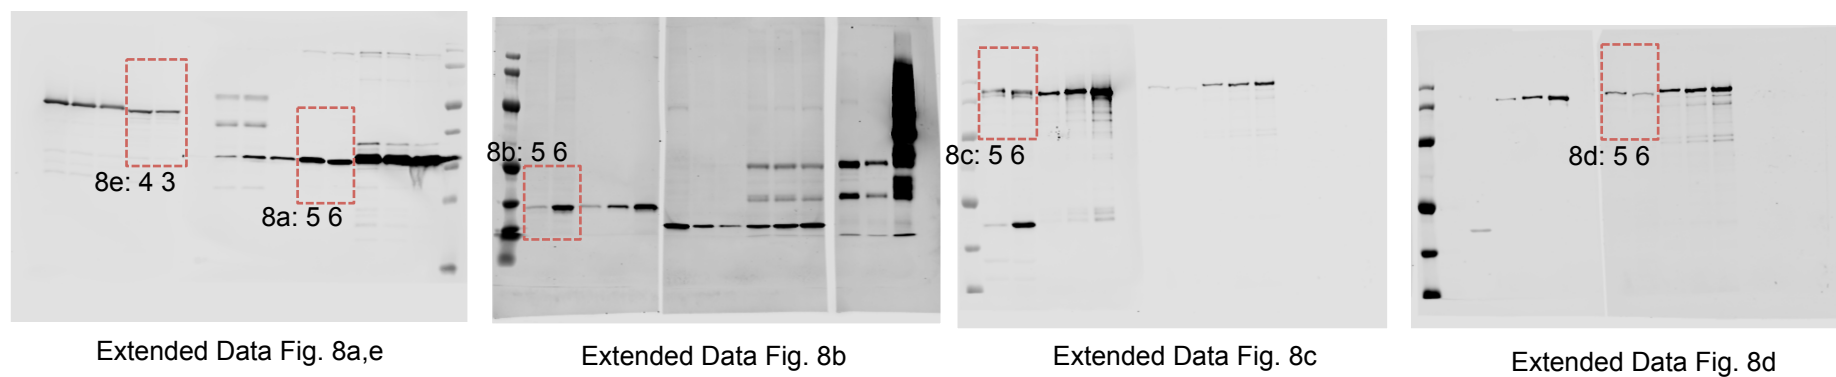

Supplement: NIHMS1554694-supplement-PLOSS_Unmodified_Gels_ED_Fig8.pdf [file NIHMS1554694-supplement-PLOSS_Unmodified_Gels_ED_Fig8.pdf]

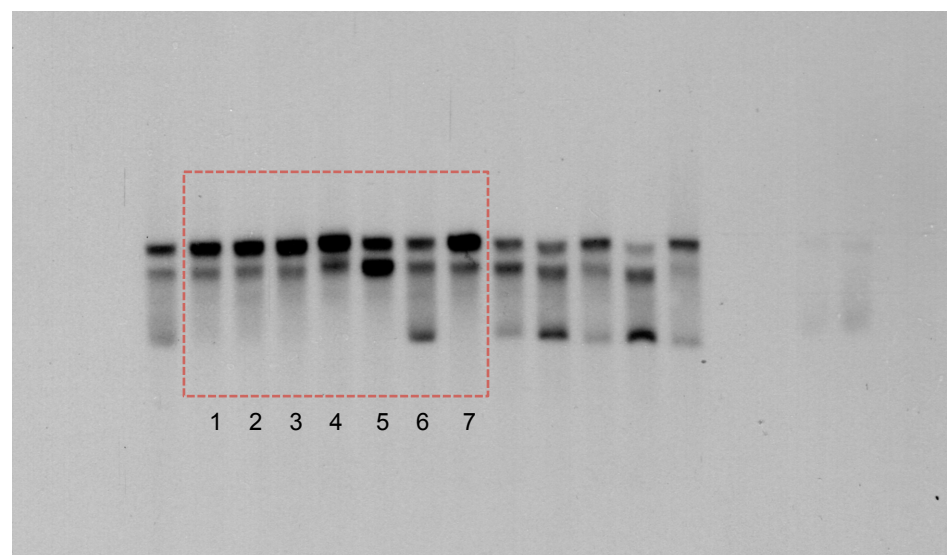

Extended Data Fig. 9a

Supplement: NIHMS1554694-supplement-PLOSS_Unmodified_Gels_ED_Fig9.pdf [file NIHMS1554694-supplement-PLOSS_Unmodified_Gels_ED_Fig9.pdf]

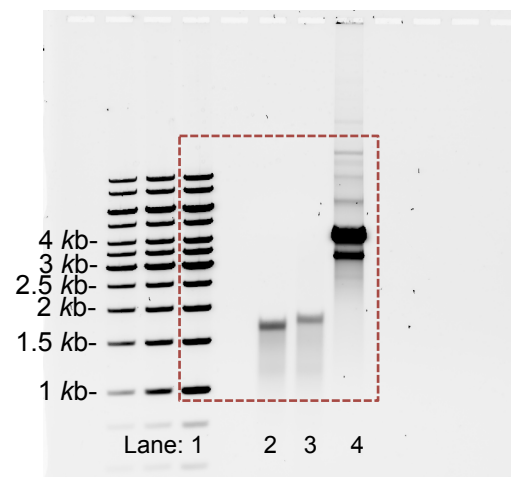

Fig. 1b

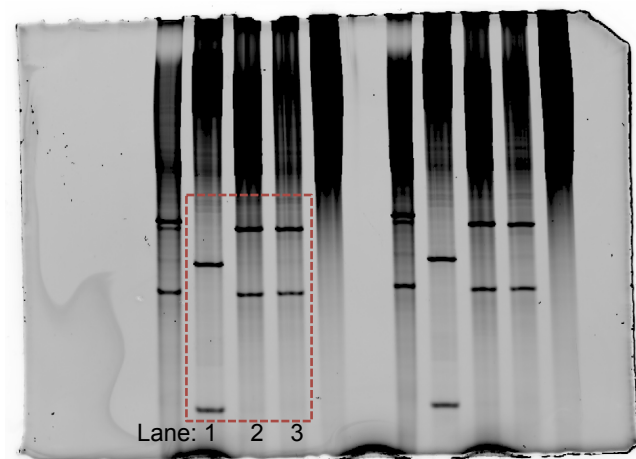

Fig. 1c

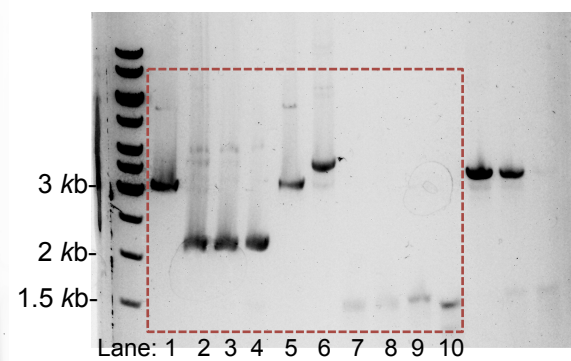

Fig. 1d

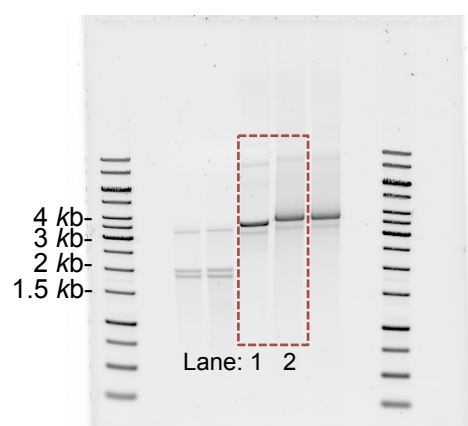

Fig. 1e, lanes 1, 2

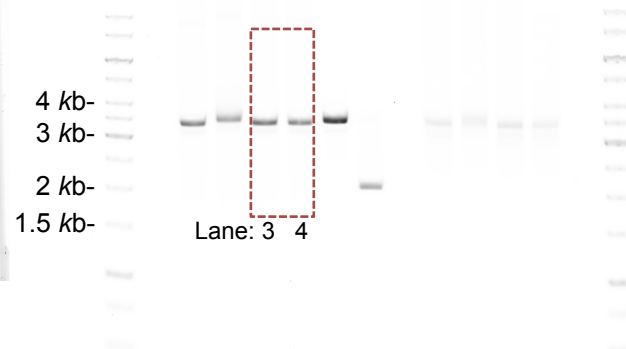

Fig. 1e, lanes 3, 4

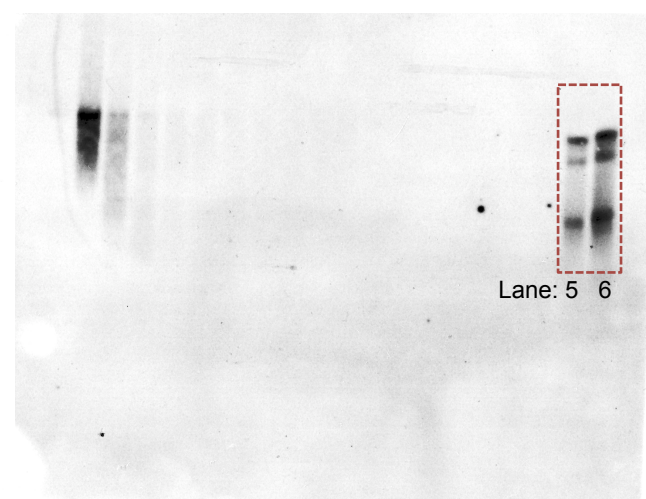

Fig. 1e, lanes 5, 6

Supplement: NIHMS1554694-supplement-PLOSS_Unmodified_Gels_Fig1.pdf [file NIHMS1554694-supplement-PLOSS_Unmodified_Gels_Fig1.pdf]

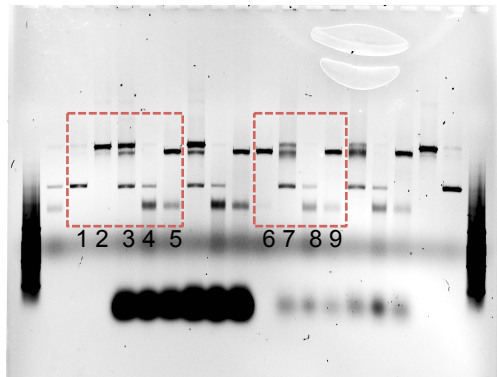

Fig. 2a

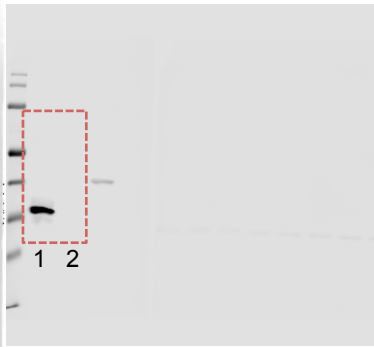

Fig. 2b

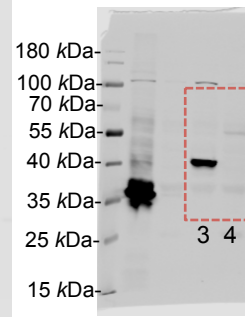

Fig. 2b

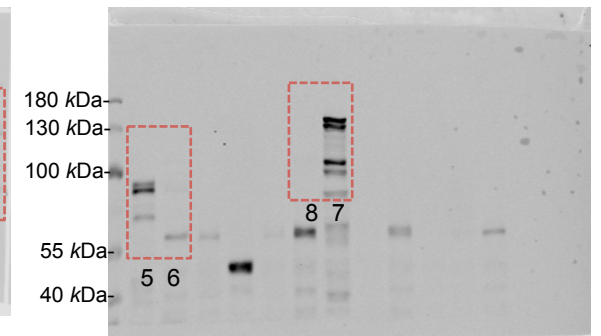

Fig. 2b

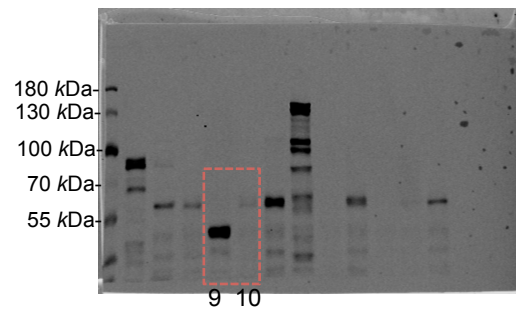

Fig. 2b

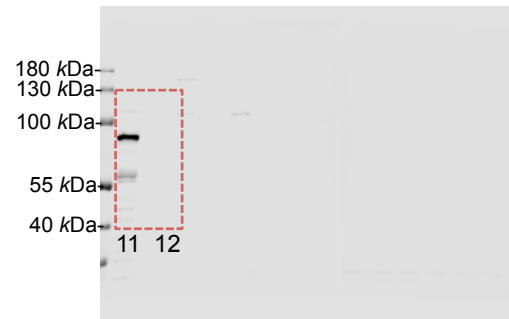

Fig. 2b

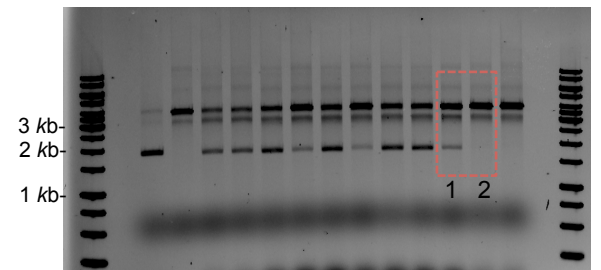

Fig. 2c

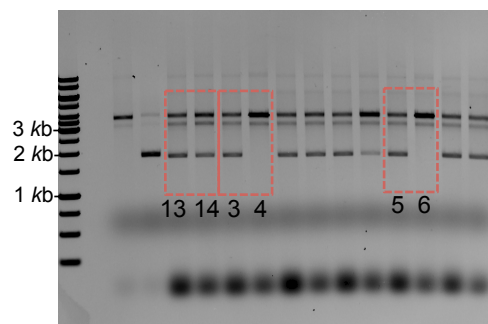

Fig. 2c

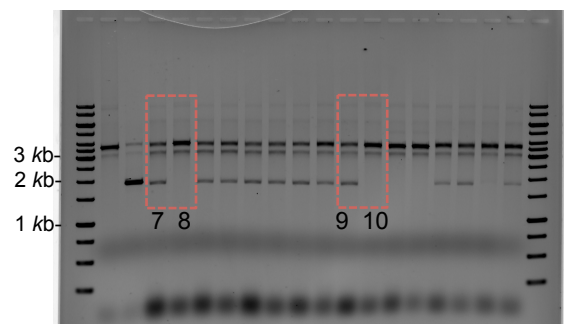

Fig. 2c

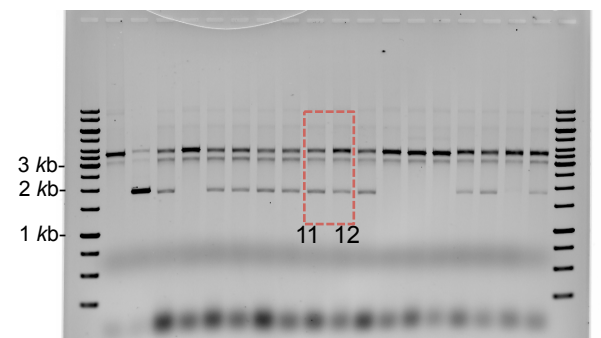

Fig. 2c

Supplement: NIHMS1554694-supplement-PLOSS_Unmodified_Gels_Fig2.pdf [file NIHMS1554694-supplement-PLOSS_Unmodified_Gels_Fig2.pdf]

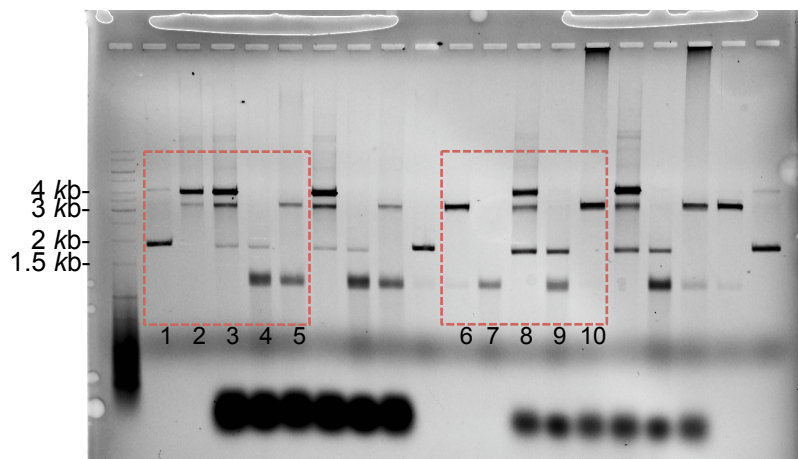

Fig. 3a

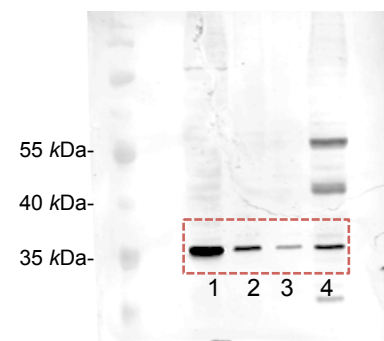

Fig. 3d

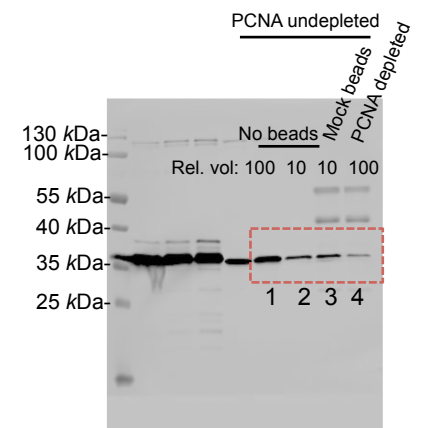

Fig. 3g

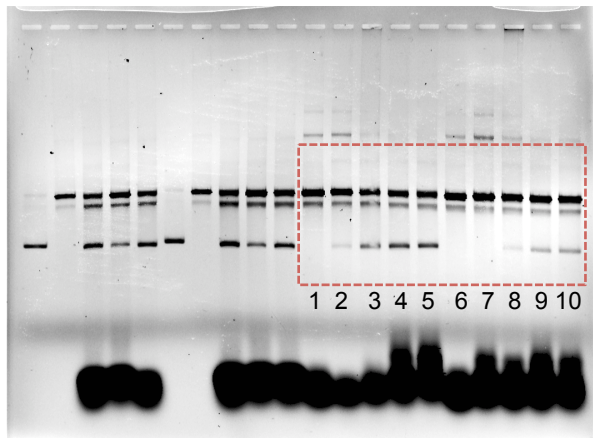

Fig. 3b

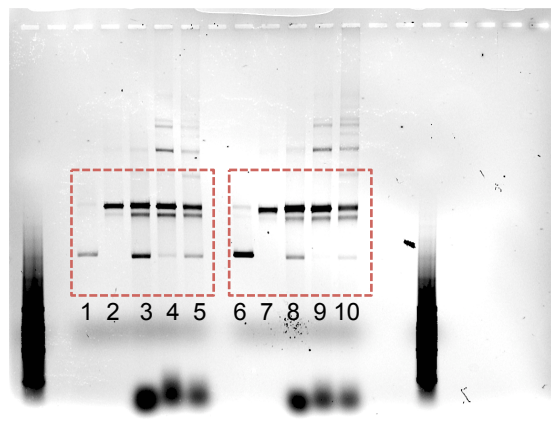

Fig. 3e,f

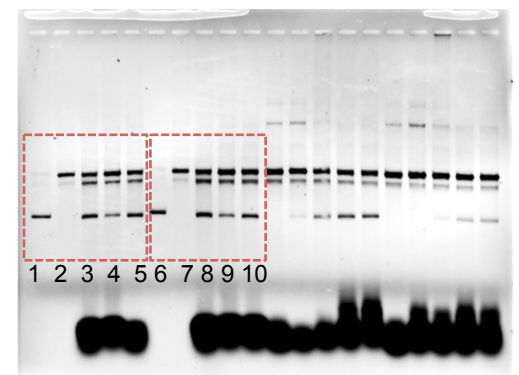

Fig. 3h,i

Supplement: NIHMS1554694-supplement-PLOSS_Unmodified_Gels_Fig3.pdf [file NIHMS1554694-supplement-PLOSS_Unmodified_Gels_Fig3.pdf]

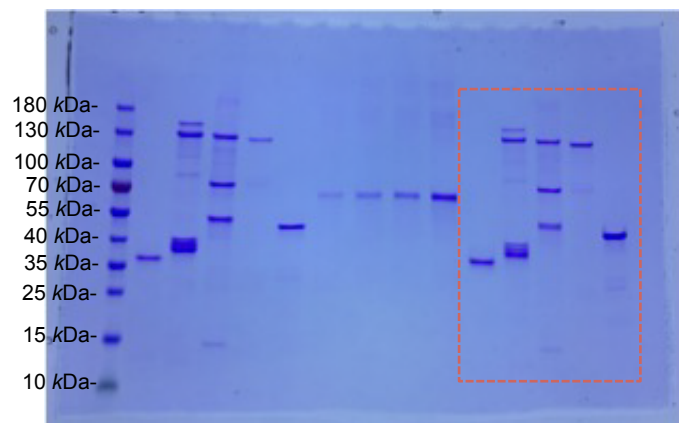

Fig. 4a

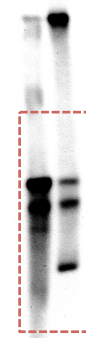

Fig. 4b

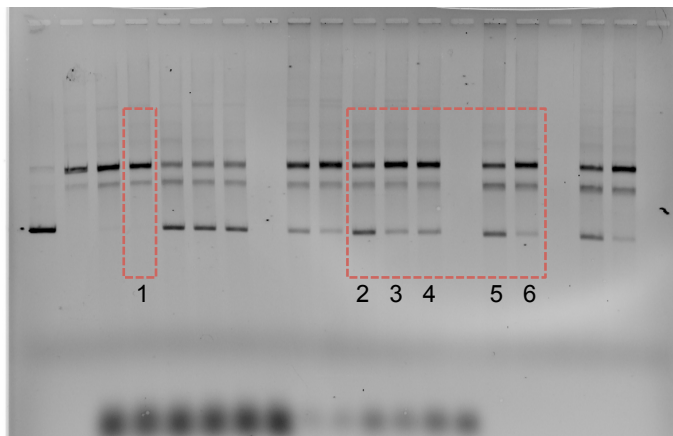

Fig. 4c

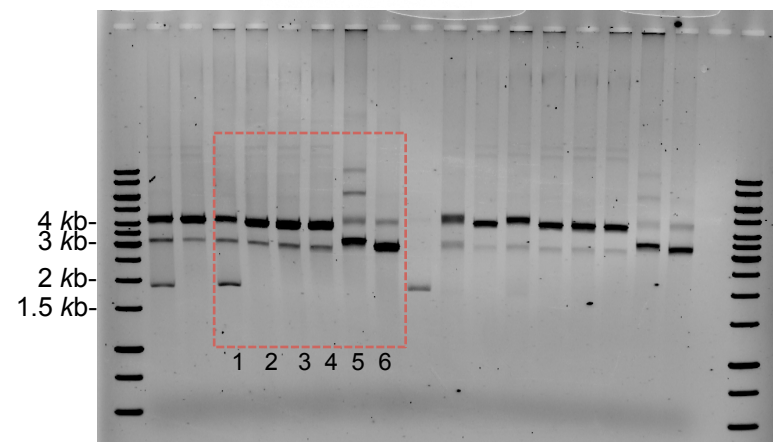

Fig. 4d

Supplement: NIHMS1554694-supplement-PLOSS_Unmodified_Gels_Fig4.pdf [file NIHMS1554694-supplement-PLOSS_Unmodified_Gels_Fig4.pdf]

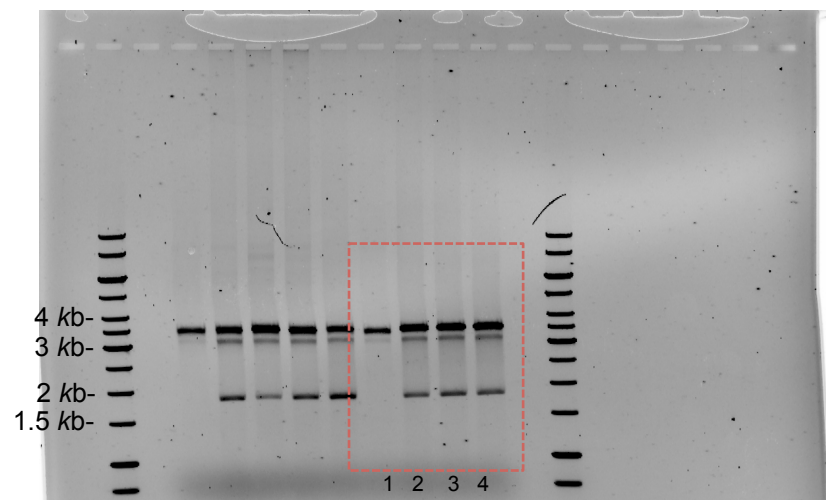

Fig. 5a

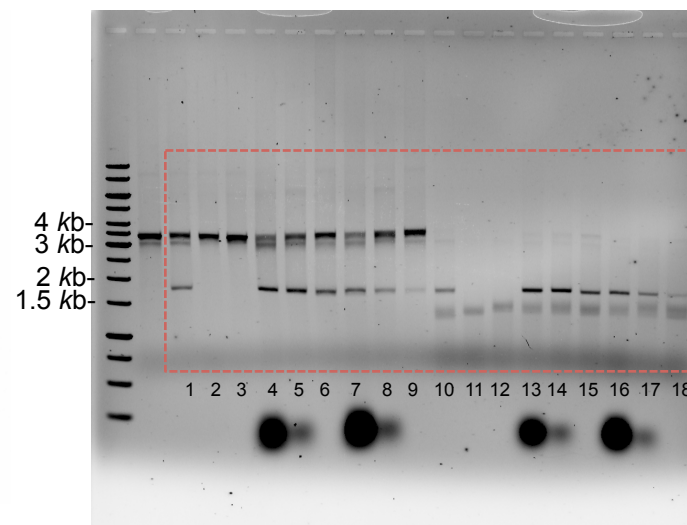

Fig. 5b

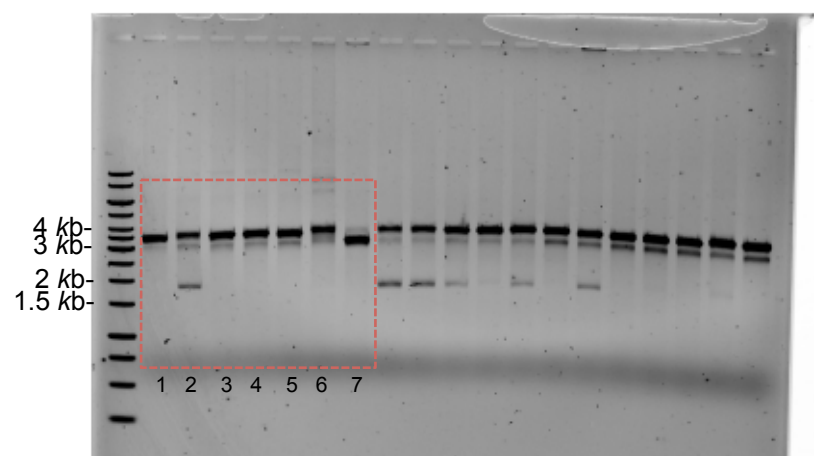

Fig. 5c

Supplement: NIHMS1554694-supplement-PLOSS_Unmodified_Gels_Fig5.pdf [file NIHMS1554694-supplement-PLOSS_Unmodified_Gels_Fig5.pdf]

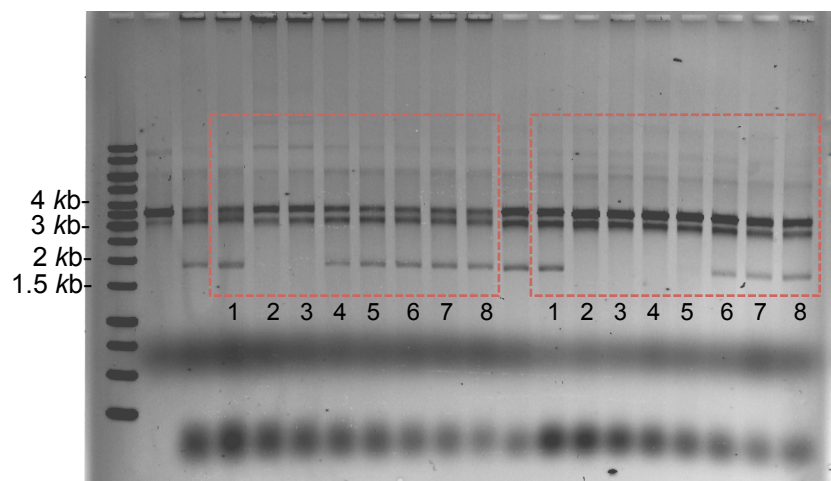

Fig. 6b

Fig. 6a

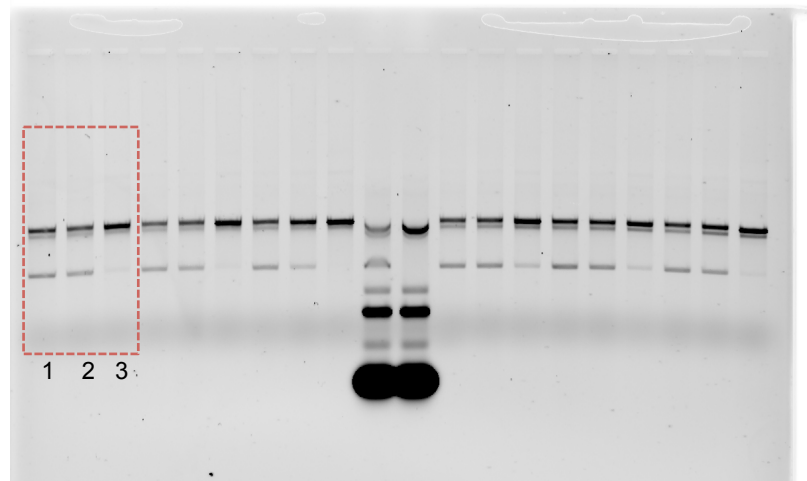

Fig. 6d

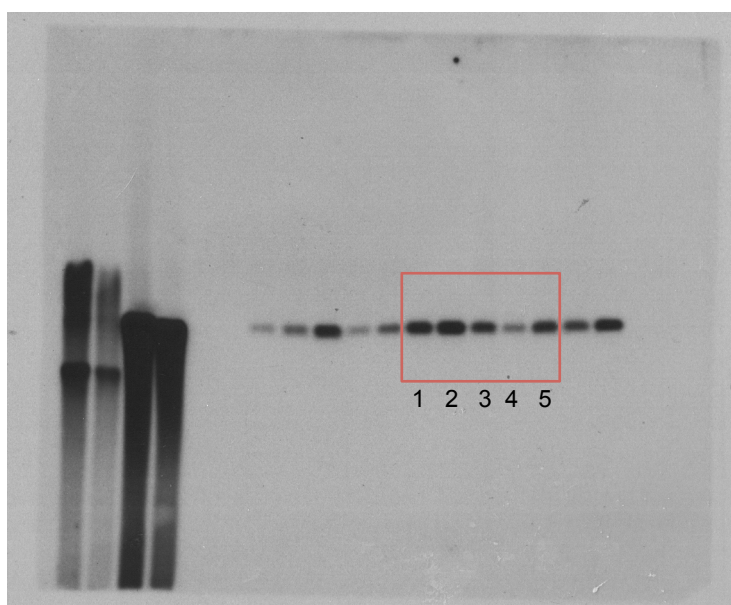

Fig. 6g

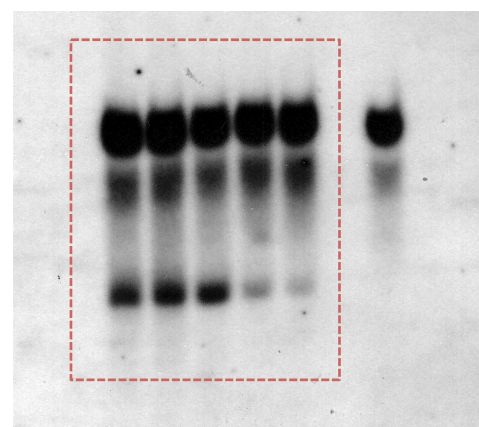

Fig. 6h

Supplement: NIHMS1554694-supplement-PLOSS_Unmodified_Gels_Fig6.pdf [file NIHMS1554694-supplement-PLOSS_Unmodified_Gels_Fig6.pdf]
